# Supplementary material for: The parallel G-quadruplex structure of vertebrate telomeric repeat sequences is not the preferred folding topology under physiological conditions
Source: PubMed Central journal article supplement — Nucleic Acids Res. 2011 Mar 30;39(13):5768–75. doi: 10.1093/nar/gkr174 (PMC3141269; doi:10.1093/nar/gkr174), 2011-03-30
Supplement: supp_gkr174_Supplementary_Information_Haensel_etal_revision_090311.pdf [file supp_gkr174_Supplementary_Information_Haensel_etal_revision_090311.pdf]

# Supplementary Material

## **The parallel G-quadruplex structure of vertebrate telomeric repeat sequences is not the preferred folding topology under physiological conditions**

**Robert Hänsel<sup>1</sup>, Frank Löhr<sup>1</sup>, Silvie Foldynová-Trantírková<sup>2</sup>, Ernst Bamberg<sup>3</sup>, Lukáš Trantírek<sup>4\*</sup> and Volker Dötsch<sup>1\*</sup>**

<sup>1</sup>Institute of Biophysical Chemistry, Goethe University, Max-von-Laue Str. 9, 60438 Frankfurt/Main, Germany, <sup>2</sup>Biology Centre, v.v.i., AS CR, Branisovska 31, 37005 Ceske Budejovice, Czech Republic, <sup>3</sup>Max-Planck-Institute of Biophysics, Max-von-Laue Str. 3, Frankfurt/Main, Germany and <sup>4</sup>Department of Chemistry, Utrecht University, Padualaan 8, 3584 CH Utrecht, The Netherlands

AUTHOR EMAIL ADDRESS: vdoetsch@em.uni-frankfurt.de; l.trantirek@uu.nl

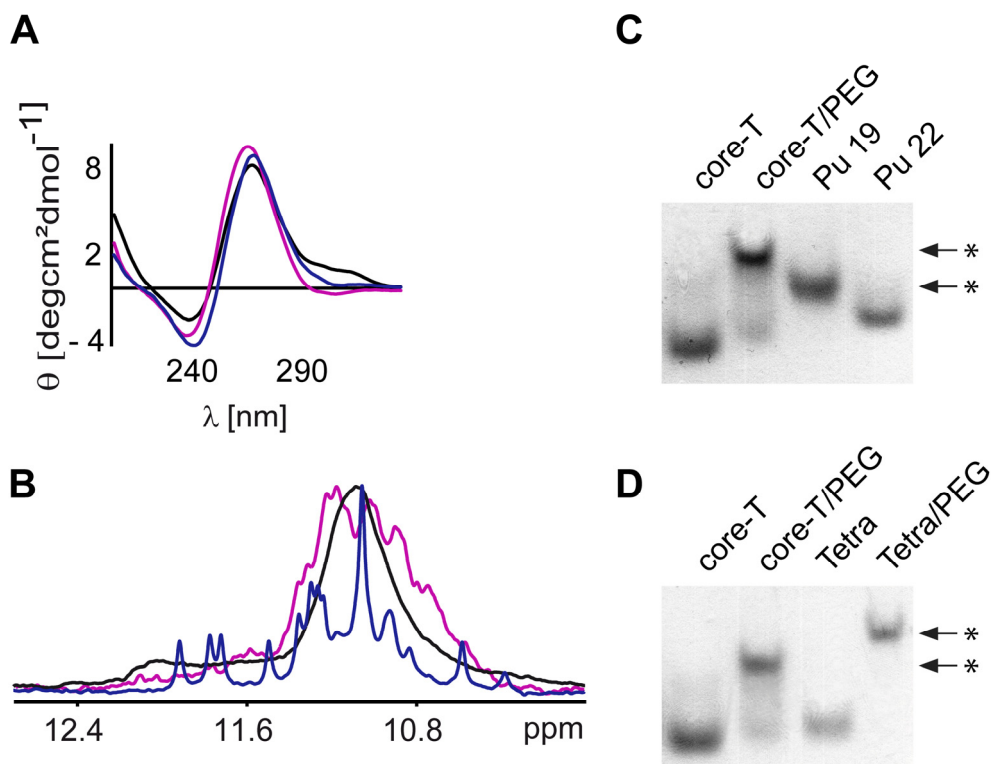

**Figure S1.** Overlays of CD (A) and NMR (B) spectra of [core-T] in the presence of PEG (black line), Pu19 d(AG<sub>3</sub>TG<sub>4</sub>AG<sub>3</sub>TG<sub>4</sub>A) and Pu22mut 14/23 d(TGAG<sub>3</sub>TG<sub>3</sub>TAG<sub>3</sub>TG<sub>3</sub>TAA) constructs in intraocyte buffer (magenta and blue lines, respectively). The Pu19 and Pu22mut 14/23 constructs originate from the c-Myc nuclease hypersensitivity element III<sub>1</sub>, which exclusively forms a parallel conformation (27). (C) Native PAGE for [core-T] the absence and presence of 40% PEG 200 and for Pu19 and Pu22mut constructs in intraocyte buffer. (D) Comparison of the native PAGE behavior of [core-T] and the *Tetrahymena thermophila* (Tetra) telomeric sequence d(G<sub>4</sub>T<sub>4</sub>G<sub>4</sub>T<sub>4</sub>G<sub>4</sub>T<sub>4</sub>G<sub>4</sub>) in the absence and presence of 40% PEG 200. The *T. thermophila* telomeric repeat was shown to form high-order structures in the presence of PEG (28). The CD spectrum of the Pu19 and the Pu22mut 14/23 constructs are characterized by a dominant band at 260 nm, typical for the parallel G-quadruplex topology. While the 1D <sup>1</sup>H 11-echo NMR spectrum for Pu22mut 14/23 shows well-resolved imino resonances, the 1D <sup>1</sup>H 11-echo NMR spectrum for Pu19 shows unresolved, broad imino signals. Slower electrophoretic mobility of Pu19 compared to Pu22mut 14/23 on a native 10% PAGE indicates that the line broadening observed in the NMR spectrum of Pu19 results from high-order parallel G-quadruplex formation (\*), while a well-resolved spectrum for Pu22mut 14/23 corresponds to a monomeric form. Analogous response of electrophoretic mobilities for [core-T] and Tetra constructs in the presence of 40% PEG 200 suggest that [core-T], similarly to the *T. thermophila* telomeric repeat, forms high-order structures (\*).

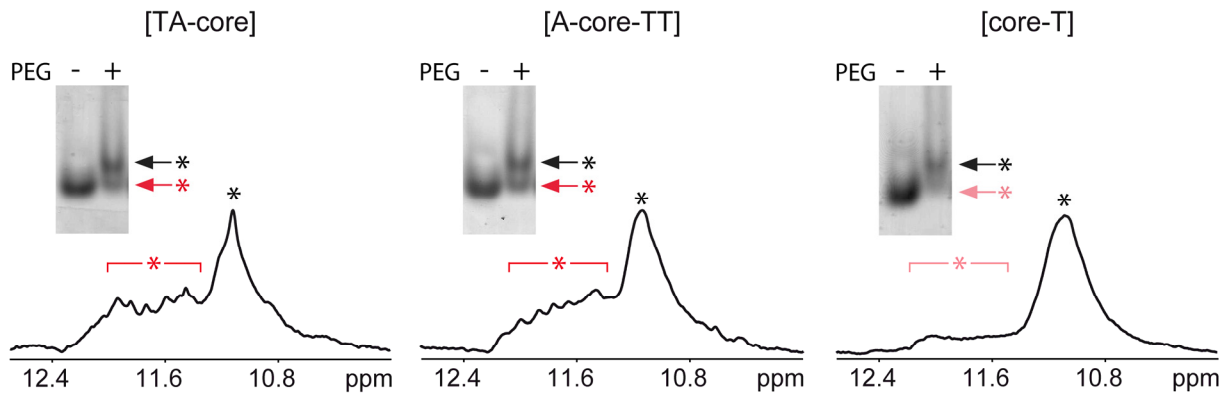

**Figure S2.** NMR spectra and native PAGE analysis of [TA-core], [A-core-TT], and [core-T] constructs in intraocyte buffer supplemented with 40% PEG. The presence of several small peaks between 11.5 and 12.4 ppm in the NMR spectra and the presence of two resolved bands on native 8% PAGE gels suggest that the dominant high-order parallel structure (\*) coexists with low-level (\*) populated alternative monomeric conformation(s).

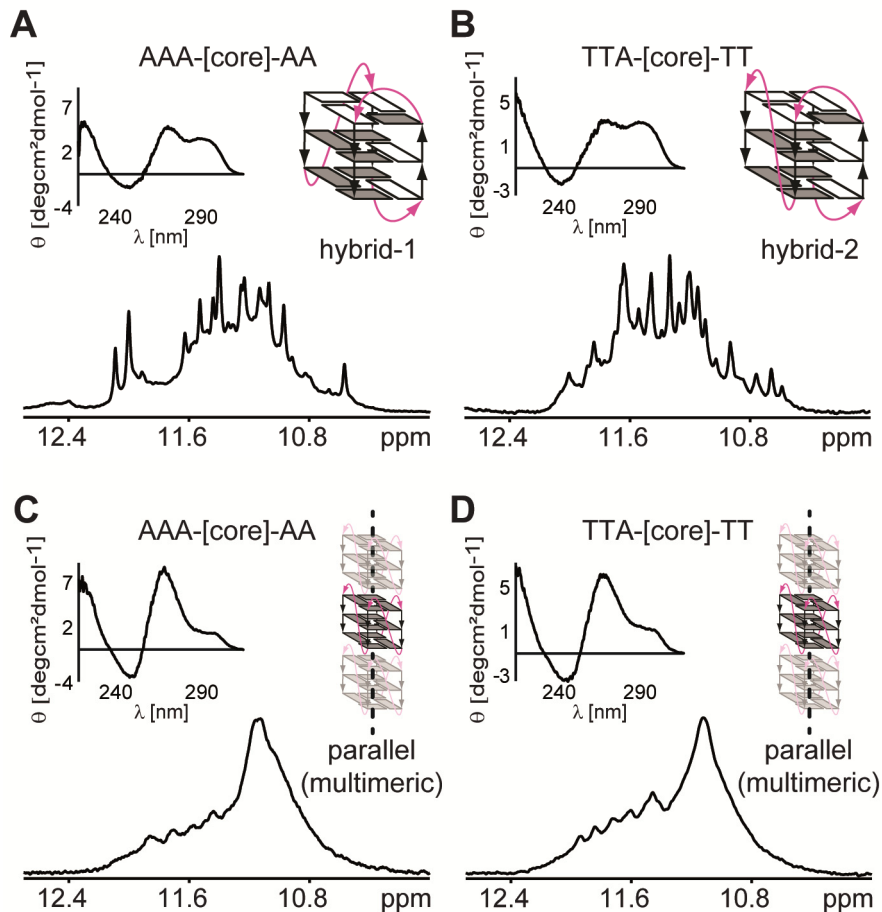

**Figure S3.** CD spectra and imino regions of 1D  $^1\text{H}$  11-echo NMR spectra for [AAA-core-AA] and [TTA-core-TT] constructs in intraocyte buffer (A-B), and in intraocyte buffer supplemented with 40% PEG 200 (C-D).

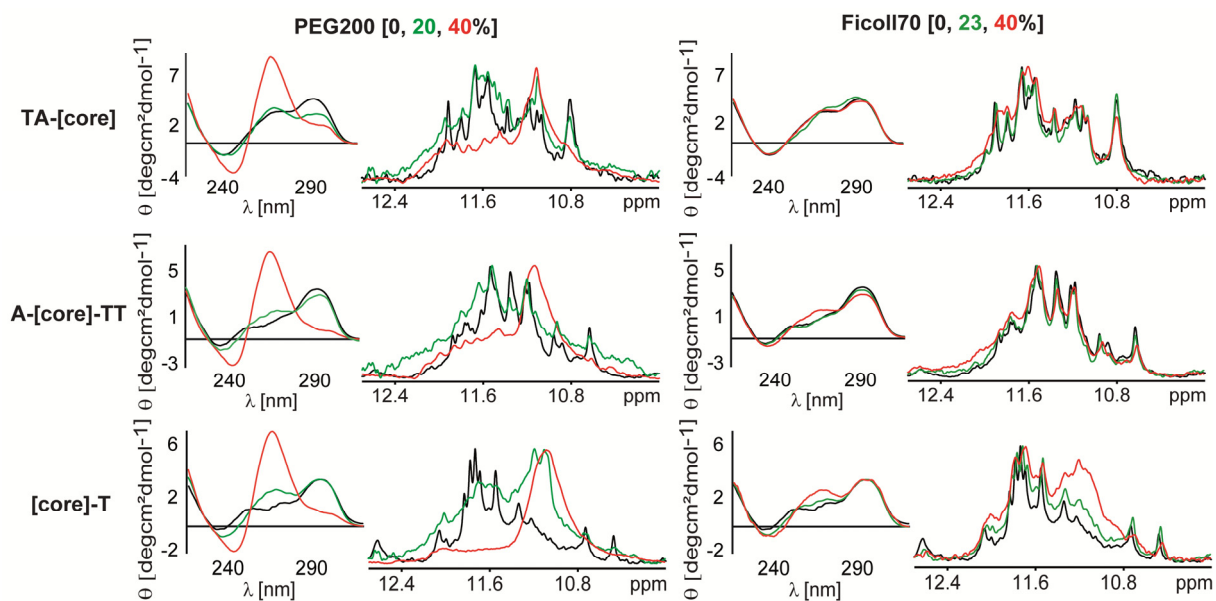

**Figure S4.** Overlays of CD spectra and imino regions of 1D <sup>1</sup>H 11-echo NMR spectra for [TA-core], [A-core-TT], and [core-T] constructs (rows) in intraocyte buffer, and in intraocyte buffer supplemented either with PEG 200 (20%, 40%) or Ficoll 70 (23%, 40%). Note that a 23% (w/v) Ficoll 70 solution simulates equivalent volume exclusion as a 40% (v/v) PEG 200 solution.

Excluded volumes of PEG 200 and Ficoll 70 were calculated based on a simple geometric model analogous to that employed by Spink and Chaires (37). In this model, the PEG 200 and Ficoll molecules were approximated as spheres with radii  $r_{\text{PEG}} = 0.57$  nm and  $r_{\text{Ficoll}} = 5.5$  nm, respectively.
